# Supplementary material for: Complete Chloroplast Genome of an Endangered Species Quercus litseoides, and Its Comparative, Evolutionary, and Phylogenetic Study with Other Quercus Section Cyclobalanopsis Species
Source: MDPI journal article supplement (doi:10.3390/genes13071184), 2022-07-01
Supplement: s1 [file s1]

# Supplementary

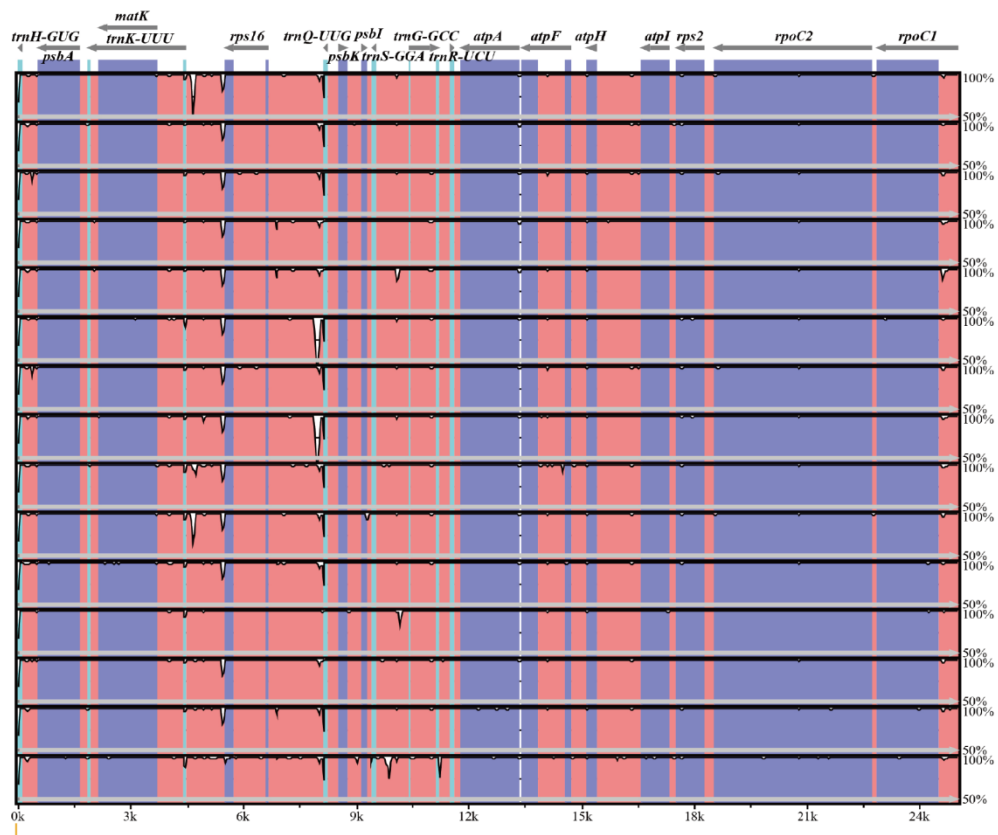

## LSC

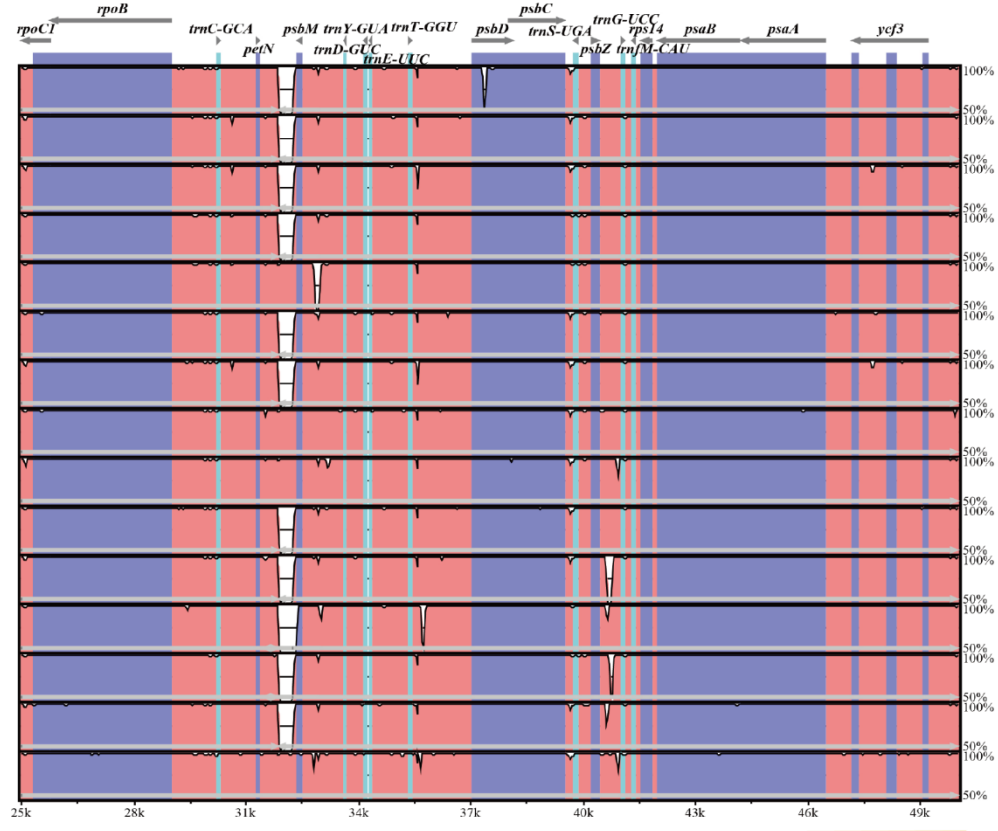

## LSC

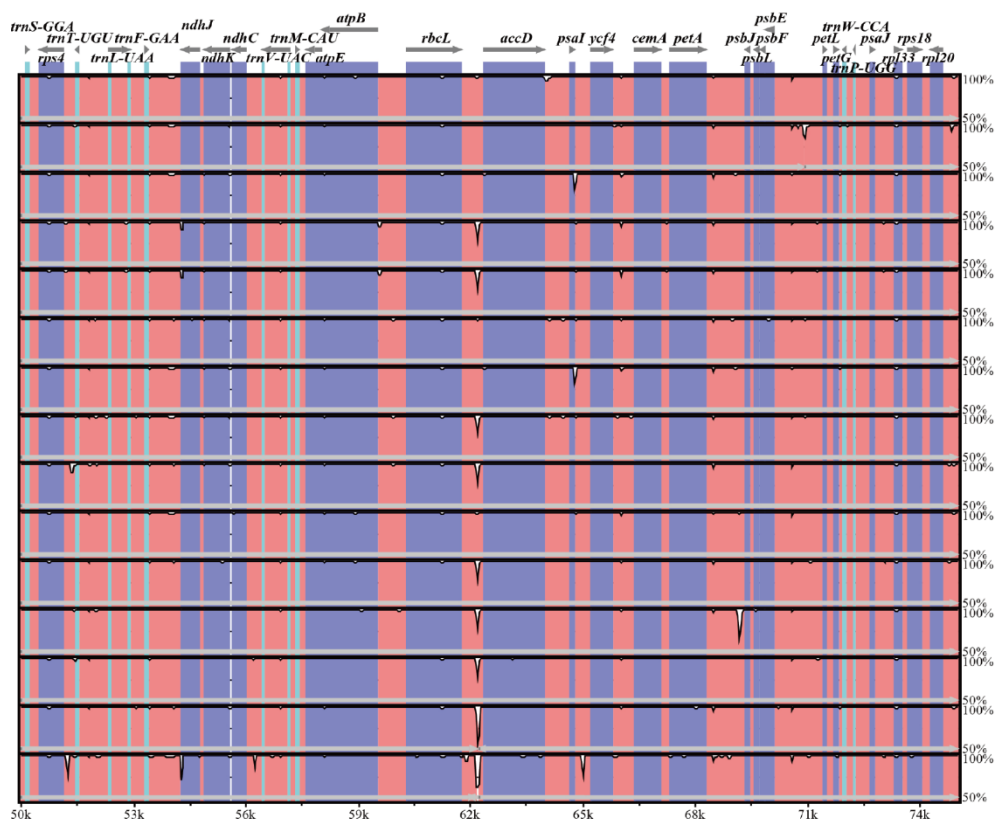

### LSC

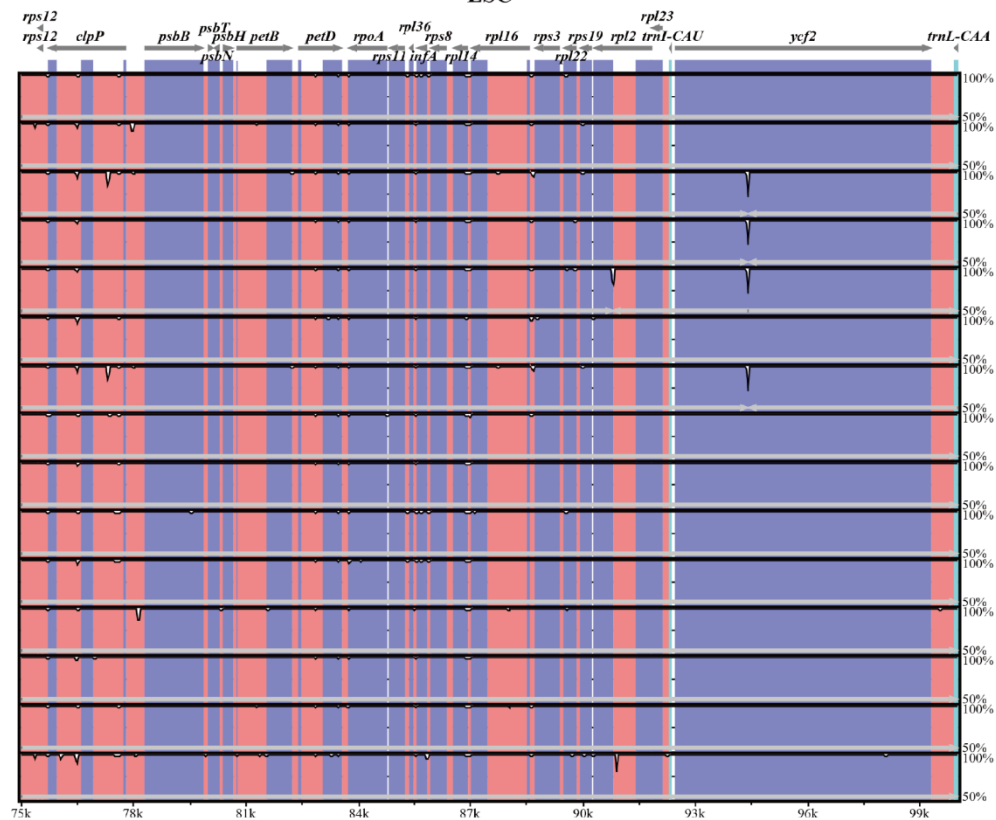

### LSC

### IRa

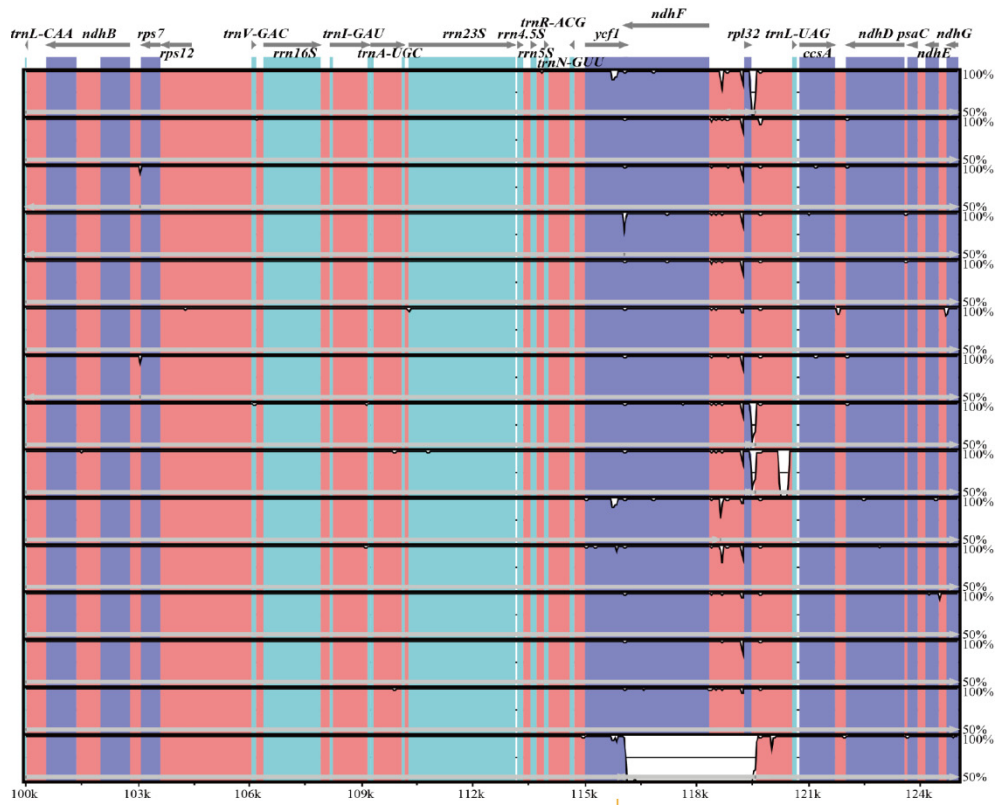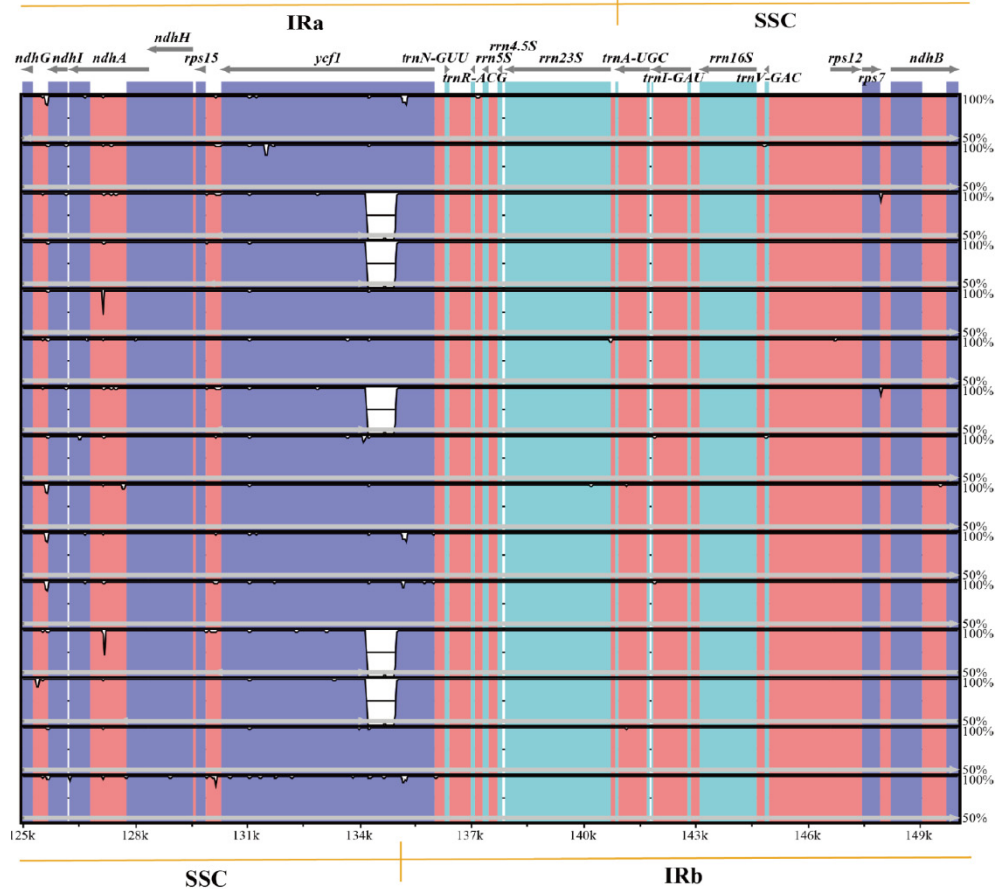

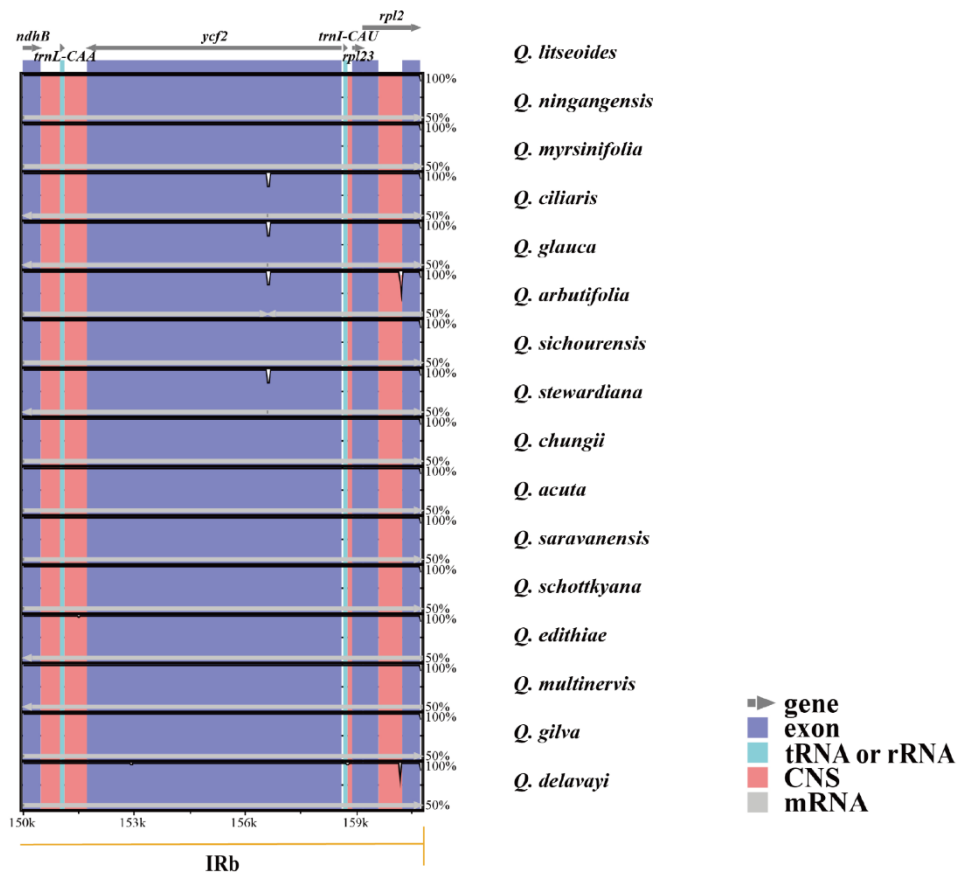

**Figure S1.** Visualization of the aligned sequence of the 16 chloroplast genomes of *Quercus* section *Cyclobalanopsis* with *Q. litseoides* as a reference using mVISTA. The gray arrows above show the locations of the reference sequence genes, and the direction is forward or reverse. The position of the genome is shown on the horizontal axis at the bottom of each block. The alignment similarity percentages are shown on the right side of the graph (vertical axis). Genome regions are color coded as protein-coding (exon), tRNA or rRNA, and conserved non-coding sequences (CNS).



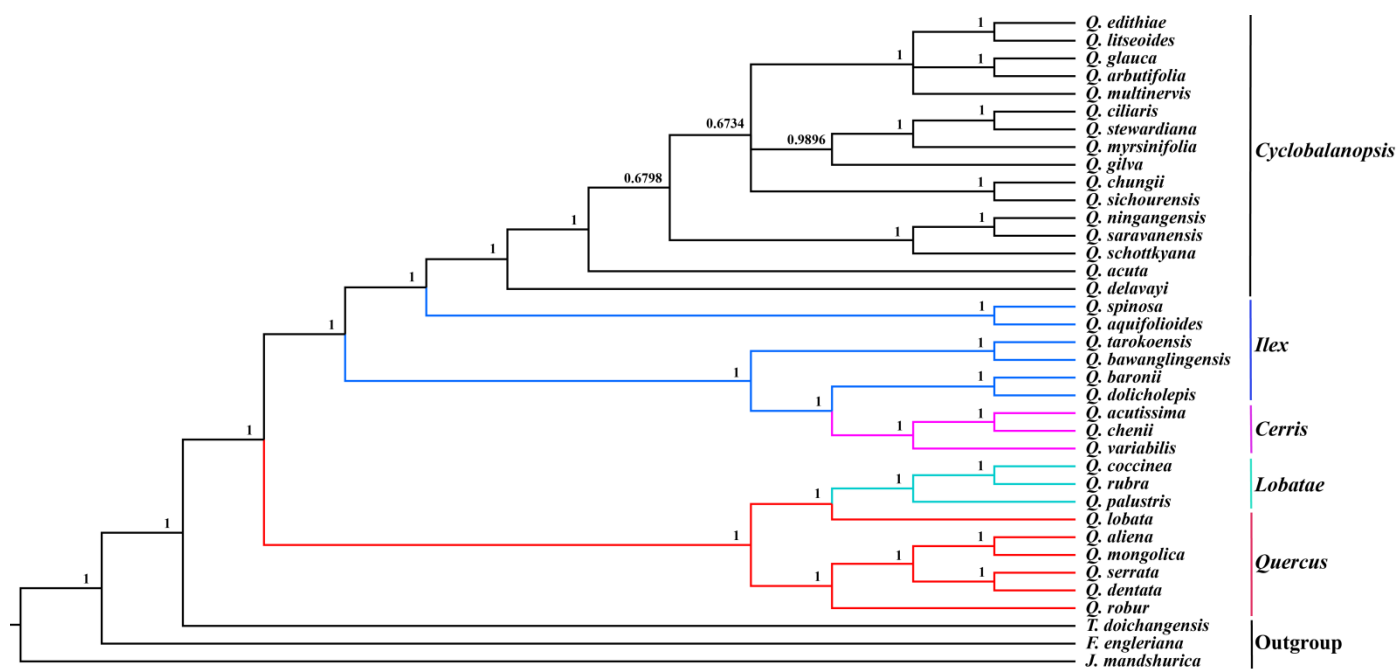

**Figure S3.** The phylogenetic tree among 37 chloroplast genome homologous sequences based on BI method. Values besides the branch represented Bayesian posterior probabilities (PP). Abbreviations: *Quercus* (Q.), *Trigonobalanus* (T.), *Fagus* (F.), and *Juglans* (J.).



**Table S1.** Information on the chloroplast genomes used in this study.

| Scientific Name                     | Chinese Name | Family       | Genus                 | Section                | Genbank No. | Size (bp) | LSC (bp) | SSC (bp) | IR (bp) |
|-------------------------------------|--------------|--------------|-----------------------|------------------------|-------------|-----------|----------|----------|---------|
| <i>Q. acuta</i>                     | 赤栎           | Fagaceae     | <i>Quercus</i>        | <i>Cyclobalanopsis</i> | NC_054352   | 160533    | 90210    | 18645    | 25839   |
| <i>Q. sichourensis</i>              | 西畴青冈         | Fagaceae     | <i>Quercus</i>        | <i>Cyclobalanopsis</i> | MF787253    | 160681    | 90154    | 18857    | 25835   |
| <i>Q. chungii</i>                   | 福建青冈         | Fagaceae     | <i>Quercus</i>        | <i>Cyclobalanopsis</i> | MW401633    | 160731    | 90140    | 18911    | 25840   |
| <i>Q. ningangensis</i>              | 宁冈青冈         | Fagaceae     | <i>Quercus</i>        | <i>Cyclobalanopsis</i> | MW628880    | 160736    | 90182    | 18904    | 25825   |
| <i>Q. gilva</i>                     | 赤皮青冈         | Fagaceae     | <i>Quercus</i>        | <i>Cyclobalanopsis</i> | MK986651    | 160742    | 90192    | 18872    | 25839   |
| <i>Q. schottkyana</i>               | 滇青冈          | Fagaceae     | <i>Quercus</i>        | <i>Cyclobalanopsis</i> | MW450872    | 160746    | 90136    | 18942    | 25834   |
| <i>Q. saravanensis</i>              | 薄叶青冈         | Fagaceae     | <i>Quercus</i>        | <i>Cyclobalanopsis</i> | MW411183    | 160767    | 90220    | 18897    | 25825   |
| <i>Q. multinervis</i>               | 多脉青冈         | Fagaceae     | <i>Quercus</i>        | <i>Cyclobalanopsis</i> | MW450871    | 160768    | 90179    | 18909    | 25840   |
| <i>Q. litseoides</i>                | 木姜叶青冈        | Fagaceae     | <i>Quercus</i>        | <i>Cyclobalanopsis</i> | ON598394    | 160782    | 90235    | 18867    | 25840   |
| <i>Q. glauca</i>                    | 青冈           | Fagaceae     | <i>Quercus</i>        | <i>Cyclobalanopsis</i> | NC_036930   | 160798    | 90229    | 18907    | 25831   |
| <i>Q. myrsinifolia</i>              | 小叶青冈         | Fagaceae     | <i>Quercus</i>        | <i>Cyclobalanopsis</i> | MN199025    | 160803    | 90223    | 18900    | 25840   |
| <i>Q. arbutifolia</i>               | 倒卵叶青冈        | Fagaceae     | <i>Quercus</i>        | <i>Cyclobalanopsis</i> | NC_039972   | 160817    | 90210    | 18989    | 25809   |
| <i>Q. delavayi</i>                  | 黄毛青冈         | Fagaceae     | <i>Quercus</i>        | <i>Cyclobalanopsis</i> | MW450870    | 160830    |          |          |         |
| <i>Q. ciliaris</i>                  | 细叶青冈         | Fagaceae     | <i>Quercus</i>        | <i>Cyclobalanopsis</i> | MN199024    | 160842    | 90294    | 18902    | 25823   |
| <i>Q. stewardiana</i>               | 褐叶青冈         | Fagaceae     | <i>Quercus</i>        | <i>Cyclobalanopsis</i> | MN199023    | 160842    | 90294    | 18902    | 25823   |
| <i>Q. edithiae</i>                  | 华南青冈         | Fagaceae     | <i>Quercus</i>        | <i>Cyclobalanopsis</i> | KU382355    | 160978    | 90342    | 18956    | 25840   |
| <i>Q. aquifolioides</i>             | 川滇高山栎        | Fagaceae     | <i>Quercus</i>        | <i>Ilex</i>            | KX911971    | 161225    | 90535    | 19000    | 25845   |
| <i>Q. baronii</i>                   | 檀子栎          | Fagaceae     | <i>Quercus</i>        | <i>Ilex</i>            | KT963087    | 161072    | 90341    | 19045    | 25843   |
| <i>Q. bawanglingensis</i>           | 坝王栎          | Fagaceae     | <i>Quercus</i>        | <i>Ilex</i>            | NC_046583   | 161394    | 90628    | 19036    | 25865   |
| <i>Q. dolicholepis</i>              | 匙叶栎          | Fagaceae     | <i>Quercus</i>        | <i>Ilex</i>            | KU240010    | 161237    | 90461    | 19048    | 25864   |
| <i>Q. spinosa</i>                   | 刺叶高山栎        | Fagaceae     | <i>Quercus</i>        | <i>Ilex</i>            | KX911972    | 161156    | 90441    | 18997    | 25859   |
| <i>Q. tarokoensis</i>               | 太鲁阁栎         | Fagaceae     | <i>Quercus</i>        | <i>Ilex</i>            | MF135621    | 161355    | 90602    | 19033    | 25860   |
| <i>Q. acutissima</i>                | 麻栎           | Fagaceae     | <i>Quercus</i>        | <i>Cerris</i>          | NC_039429   | 161127    | 90423    | 19070    | 25817   |
| <i>Q. chenii</i>                    | 小叶栎          | Fagaceae     | <i>Quercus</i>        | <i>Cerris</i>          | MF593894    | 161117    | 90419    | 19064    | 25817   |
| <i>Q. variabilis</i>                | 栓皮栎          | Fagaceae     | <i>Quercus</i>        | <i>Cerris</i>          | NC_031356   | 161077    | 90387    | 19056    | 25817   |
| <i>Q. coccinea</i>                  | 猩红栎          | Fagaceae     | <i>Quercus</i>        | <i>Lobatae</i>         | NC_047481   | 161298    | 90558    | 19040    | 25850   |
| <i>Q. palustris</i>                 | 沼生栎          | Fagaceae     | <i>Quercus</i>        | <i>Lobatae</i>         | MK105461    | 161284    | 90624    | 18956    | 25852   |
| <i>Q. rubra</i>                     | 红槲栎          | Fagaceae     | <i>Quercus</i>        | <i>Lobatae</i>         | NC_020152   | 161304    | 90541    | 19021    | 25871   |
| <i>Q. aliena</i>                    | 槲栎           | Fagaceae     | <i>Quercus</i>        | <i>Quercus</i>         | KU240007    | 161150    | 90444    | 19054    | 25826   |
| <i>Q. dentata</i>                   | 槲树           | Fagaceae     | <i>Quercus</i>        | <i>Quercus</i>         | MG967555    | 161250    | 90560    | 19038    | 25826   |
| <i>Q. lobata</i>                    | 加州栎          | Fagaceae     | <i>Quercus</i>        | <i>Quercus</i>         | CM012305    | 161289    |          |          |         |
| <i>Q. mongolica</i>                 | 蒙古栎          | Fagaceae     | <i>Quercus</i>        | <i>Quercus</i>         | MK089571    | 161194    | 90504    | 19048    | 25821   |
| <i>Q. robur</i>                     | 夏栎           | Fagaceae     | <i>Quercus</i>        | <i>Quercus</i>         | MN562095    | 161172    | 90505    | 18997    | 25835   |
| <i>Q. serrata</i>                   | 枹栎           | Fagaceae     | <i>Quercus</i>        | <i>Quercus</i>         | MK922350    | 161266    | 90580    | 19034    | 25826   |
| <i>Fagus engleriana</i>             | 米心水青冈        | Fagaceae     | <i>Fagus</i>          | /                      | NC_036929   | 158346    | 87667    | 18895    | 25892   |
| <i>Trigonobalanus doichangensis</i> | 三棱栎          | Fagaceae     | <i>Trigonobalanus</i> | /                      | NC_023959   | 159938    | 89445    | 19297    | 25598   |
| <i>Juglans mandshurica</i>          | 胡桃楸          | Juglandaceae | <i>Juglans</i>        | <i>Cardiocaryon</i>    | NC_033892   | 159729    | 89845    | 18352    | 25766   |

**Table S2.** Minisatellite sequences in the chloroplast genome of *Q. litseoides*.

| No. | Repeat Type | Repeat Length (bp) | Position       | Copy Number | Percent Indels | A  | C  | G  | T  |
|-----|-------------|--------------------|----------------|-------------|----------------|----|----|----|----|
| 1   | M           | 19                 | 54223--54262   | 2.1         | 0              | 32 | 0  | 0  | 67 |
| 2   | M           | 20                 | 90843--90902   | 3           | 0              | 35 | 10 | 5  | 50 |
| 3   | M           | 21                 | 95062--95129   | 3.2         | 0              | 11 | 22 | 7  | 58 |
| 4   | M           | 31                 | 113362--113422 | 2           | 0              | 39 | 22 | 9  | 27 |
| 5   | M           | 31                 | 137596--137656 | 2           | 0              | 27 | 9  | 22 | 39 |
| 6   | M           | 21                 | 155890--155978 | 4.1         | 5              | 56 | 7  | 23 | 12 |
| 7   | M           | 20                 | 160116--160175 | 3           | 0              | 50 | 5  | 10 | 35 |



**Table S3.** Forward repeat sequences (F), reverse repeat sequences (R), complementary repeat sequences (C), and palindromic repeat sequences (P) in the chloroplast genome of *Q. litseoides*.

| No. | Repeat Type | Repeat Length (bp) | Initial Position 1 | Region 1 | Location 1                             | Initial Position 2 | Region 2 | Location 2                                |
|-----|-------------|--------------------|--------------------|----------|----------------------------------------|--------------------|----------|-------------------------------------------|
| 8   | F           | 40                 | 90842              | IRa      | <i>rpl2</i>                            | 90862              | IRa      | <i>rpl2</i>                               |
| 9   | F           | 40                 | 160115             | IRb      | <i>rpl2</i>                            | 160135             | IRb      | <i>rpl2</i>                               |
| 10  | F           | 39                 | 48386              | LSC      | <i>ycf3</i>                            | 104450             | IRa      | IGS ( <i>rps12</i> , <i>trnV</i> -GAC)    |
| 11  | F           | 40                 | 104448             | IRa      | IGS ( <i>rps12</i> , <i>trnV</i> -GAC) | 126827             | SSC      | <i>ndhA</i>                               |
| 12  | F           | 30                 | 113361             | IRa      | IGS ( <i>rrn4.5S</i> , <i>rrn5S</i> )  | 113392             | IRa      | IGS ( <i>rrn4.5S</i> , <i>rrn5S</i> )     |
| 13  | F           | 30                 | 137595             | IRb      | IGS ( <i>rrn5S</i> , <i>rrn4.5S</i> )  | 137626             | IRb      | IGS ( <i>rrn5S</i> , <i>rrn4.5S</i> )     |
| 14  | F           | 30                 | 43335              | LSC      | <i>psaB</i>                            | 45559              | LSC      | <i>psaA</i>                               |
| 15  | F           | 30                 | 48398              | LSC      | <i>ycf3</i>                            | 104462             | IRa      | IGS ( <i>rps12</i> , <i>trnV</i> -GAC)    |
| 16  | F           | 30                 | 104458             | IRa      | IGS ( <i>rps12</i> , <i>trnV</i> -GAC) | 126837             | SSC      | <i>ndhA</i>                               |
| 17  | F           | 30                 | 115615             | IRa      | <i>ycf1</i>                            | 135372             | IRb      | <i>ycf1</i>                               |
| 18  | F           | 32                 | 95061              | IRa      | <i>ycf2</i>                            | 95082              | IRa      | <i>ycf2</i>                               |
| 19  | F           | 32                 | 155903             | IRb      | <i>ycf2</i>                            | 155924             | IRb      | <i>ycf2</i>                               |
| 20  | F           | 30                 | 9419               | LSC      | <i>trnS</i> -GGA                       | 39749              | LSC      | <i>trnS</i> -UGA                          |
| 21  | F           | 30                 | 11175              | LSC      | <i>trnG</i> -GCC                       | 41080              | LSC      | <i>trnG</i> -UCC                          |
| 22  | R           | 31                 | 11651              | LSC      | IGS ( <i>trnR</i> -UCU, <i>atpA</i> )  | 11651              | LSC      | IGS ( <i>trnR</i> -UCU, <i>atpA</i> )     |
| 23  | R           | 31                 | 76453              | LSC      | <i>clpP</i>                            | 76453              | LSC      | <i>clpP</i>                               |
| 24  | R           | 31                 | 13329              | LSC      | IGS ( <i>atpA</i> , <i>atpF</i> )      | 33892              | LSC      | IGS ( <i>trnD</i> -GUC, <i>trnY</i> -GUA) |
| 25  | R           | 33                 | 76455              | LSC      | <i>clpP</i>                            | 76455              | LSC      | <i>clpP</i>                               |
| 26  | C           | 34                 | 6821               | LSC      | IGS ( <i>rps16</i> , <i>trnQ</i> -UUG) | 11709              | LSC      | IGS ( <i>trnR</i> -UCU, <i>atpA</i> )     |
| 27  | C           | 30                 | 68456              | LSC      | IGS ( <i>petA</i> , <i>psbI</i> )      | 76457              | LSC      | <i>clpP</i>                               |
| 28  | P           | 56                 | 123559             | SSC      | IGS ( <i>ndhD</i> , <i>psaC</i> )      | 123559             | SSC      | IGS ( <i>ndhD</i> , <i>psaC</i> )         |
| 29  | P           | 44                 | 80117              | LSC      | IGS ( <i>psbT</i> , <i>psbN</i> )      | 80117              | LSC      | IGS ( <i>psbT</i> , <i>psbN</i> )         |
| 30  | P           | 40                 | 90842              | IRa      | <i>rpl12</i>                           | 160115             | IRb      | <i>rpl2</i>                               |
| 31  | P           | 40                 | 90862              | IRa      | <i>rpl12</i>                           | 160135             | IRb      | <i>rpl2</i>                               |
| 32  | P           | 38                 | 14810              | LSC      | IGS ( <i>atpF</i> , <i>atpH</i> )      | 14810              | LSC      | IGS ( <i>atpF</i> , <i>atpH</i> )         |
| 33  | P           | 34                 | 134165             | SSC      | <i>ycf1</i>                            | 134165             | SSC      | <i>ycf1</i>                               |
| 34  | P           | 39                 | 48386              | LSC      | <i>ycf3</i>                            | 146528             | IRb      | IGS ( <i>trnV</i> -GAC, <i>rps12</i> )    |
| 35  | P           | 40                 | 126827             | SSC      | <i>ndhA</i>                            | 146529             | IRb      | IGS ( <i>trnV</i> -GAC, <i>rps12</i> )    |
| 36  | P           | 39                 | 36215              | LSC      | IGS ( <i>trnT</i> -GGU, <i>psbD</i> )  | 36215              | LSC      | IGS ( <i>trnT</i> -GGU, <i>psbD</i> )     |
| 37  | P           | 30                 | 9422               | LSC      | <i>trnS</i> -GGA                       | 50163              | LSC      | <i>trnS</i> -GGA                          |
| 38  | P           | 30                 | 113361             | IRa      | IGS ( <i>rrn4.5S</i> , <i>rrn5S</i> )  | 137595             | IRb      | IGS ( <i>rrn5S</i> , <i>rrn4.5S</i> )     |
| 39  | P           | 30                 | 113392             | IRa      | IGS ( <i>rrn4.5S</i> , <i>rrn5S</i> )  | 137626             | IRb      | IGS ( <i>rrn5S</i> , <i>rrn4.5S</i> )     |
| 40  | P           | 32                 | 211                | LSC      | IGS ( <i>trnH</i> -GUG, <i>psbA</i> )  | 211                | LSC      | IGS ( <i>trnH</i> -GUG, <i>psbA</i> )     |
| 41  | P           | 30                 | 48398              | LSC      | <i>ycf3</i>                            | 146525             | IRb      | IGS ( <i>trnV</i> -GAC, <i>rps12</i> )    |
| 42  | P           | 30                 | 115615             | IRa      | <i>ycf1</i>                            | 115615             | IRa      | <i>ycf1</i>                               |
| 43  | P           | 30                 | 126837             | SSC      | <i>ndhA</i>                            | 146529             | IRb      | IGS ( <i>trnV</i> -GAC, <i>rps12</i> )    |
| 44  | P           | 30                 | 135372             | IRb      | <i>ycf1</i>                            | 135372             | IRb      | <i>ycf1</i>                               |
| 45  | P           | 32                 | 62160              | LSC      | IGS ( <i>rbcL</i> , <i>accD</i> )      | 62213              | LSC      | IGS ( <i>rbcL</i> , <i>accD</i> )         |
| 46  | P           | 32                 | 95061              | IRa      | <i>ycf2</i>                            | 155903             | IRb      | <i>ycf2</i>                               |
| 47  | P           | 32                 | 95082              | IRa      | <i>ycf2</i>                            | 155924             | IRb      | <i>ycf2</i>                               |
| 48  | P           | 30                 | 39752              | LSC      | <i>trnS</i> -UGA                       | 50163              | LSC      | <i>trnS</i> -GGA                          |

**Table S4.** Ka, Ks, and Ka/Ks ( $\omega$ ) values of 78 shared functional protein-coding genes in 16 chloroplast genomes of *Quercus* section *Cyclobalanopsis*.

| PCG            | nonsynonymous substitution rate (Ka) | synonymous substitution rate (Ks) | PCG             | nonsynonymous substitution rate (Ka) | synonymous substitution rate (Ks) | Ka/Ks ( $\omega$ ) |
|----------------|--------------------------------------|-----------------------------------|-----------------|--------------------------------------|-----------------------------------|--------------------|
| <i>psbK</i>    | 0                                    | 0                                 | <i>rpoB</i>     | 0.00005                              | 0.00017                           | 0.29               |
| <i>atpH</i>    | 0                                    | 0                                 | <i>rpoC2</i>    | 0.0003                               | 0.00026                           | 1.15               |
| <i>rps2</i>    | 0.00125                              | 0                                 | <i>rpoC1</i>    | 0.00047                              | 0.00026                           | 1.81               |
| <i>petN</i>    | 0                                    | 0                                 | <i>psbB</i>     | 0                                    | 0.00034                           | 0                  |
| <i>psbM</i>    | 0                                    | 0                                 | <i>matK</i>     | 0.00043                              | 0.00036                           | 1.19               |
| <i>psbZ</i>    | 0                                    | 0                                 | <i>rbcL</i>     | 0.00033                              | 0.00036                           | 0.92               |
| <i>rps14</i>   | 0                                    | 0                                 | <i>psbC</i>     | 0                                    | 0.00037                           | 0                  |
| <i>rps4</i>    | 0.0005                               | 0                                 | <i>psaA</i>     | 0                                    | 0.00047                           | 0                  |
| <i>atpE</i>    | 0                                    | 0                                 | <i>ndhH</i>     | 0                                    | 0.00047                           | 0                  |
| <i>psaI</i>    | 0                                    | 0                                 | <i>psaB</i>     | 0                                    | 0.00049                           | 0                  |
| <i>ycf4</i>    | 0                                    | 0                                 | <i>ndhK</i>     | 0.00102                              | 0.00073                           | 1.4                |
| <i>cemA</i>    | 0                                    | 0                                 | <i>accD</i>     | 0.00038                              | 0.00073                           | 0.52               |
| <i>petA</i>    | 0.00051                              | 0                                 | <i>psbD</i>     | 0                                    | 0.00078                           | 0                  |
| <i>psbJ</i>    | 0                                    | 0                                 | <i>psbA</i>     | 0                                    | 0.001                             | 0                  |
| <i>psbF</i>    | 0                                    | 0                                 | <i>atpA</i>     | 0                                    | 0.001                             | 0                  |
| <i>petL</i>    | 0                                    | 0                                 | <i>ndhF</i>     | 0.00049                              | 0.0011                            | 0.45               |
| <i>psaJ</i>    | 0                                    | 0                                 | <i>ndhJ</i>     | 0                                    | 0.00117                           | 0                  |
| <i>rpl33</i>   | 0.00077                              | 0                                 | <i>ycf1</i>     | 0.00073                              | 0.00134                           | 0.54               |
| <i>rpl20</i>   | 0                                    | 0                                 | <i>rpl16</i>    | 0                                    | 0.00135                           | 0                  |
| <i>psbT</i>    | 0                                    | 0                                 | <i>atpI</i>     | 0.00023                              | 0.00141                           | 0.16               |
| <i>psbN</i>    | 0                                    | 0                                 | <i>ndhC</i>     | 0                                    | 0.00144                           | 0                  |
| <i>psbH</i>    | 0                                    | 0                                 | <i>rps18</i>    | 0                                    | 0.00152                           | 0                  |
| <i>petB</i>    | 0                                    | 0                                 | <i>psbE</i>     | 0                                    | 0.00216                           | 0                  |
| <i>rpoA</i>    | 0.00017                              | 0                                 | <i>atpB</i>     | 0                                    | 0.00245                           | 0                  |
| <i>rps11</i>   | 0                                    | 0                                 | <i>ndhA</i>     | 0.00084                              | 0.0026                            | 0.32               |
| <i>rps8</i>    | 0                                    | 0                                 | <i>ycf3</i>     | 0.00193                              | 0.00305                           | 0.63               |
| <i>rpl14</i>   | 0                                    | 0                                 | <i>rps12</i>    | 0.00682                              | 0.0036                            | 1.89               |
| <i>rps3</i>    | 0.00049                              | 0                                 | <i>clpP</i>     | 0.00024                              | 0.00426                           | 0.06               |
| <i>ndhB</i>    | 0                                    | 0                                 | <i>petG</i>     | 0                                    | 0.00444                           | 0                  |
| <i>rps7</i>    | 0                                    | 0                                 | <i>psbL</i>     | 0                                    | 0.00514                           | 0                  |
| <i>rpl32</i>   | 0                                    | 0                                 | <i>ndhE</i>     | 0                                    | 0.00528                           | 0                  |
| <i>ccsA</i>    | 0.00049                              | 0                                 | <i>atpF</i>     | 0.01199                              | 0.00635                           | 1.89               |
| <i>psaC</i>    | 0                                    | 0                                 | <i>rps19</i>    | 0                                    | 0.00718                           | 0                  |
| <i>ndhG</i>    | 0.00031                              | 0                                 | <i>petD</i>     | 0.00214                              | 0.00767                           | 0.28               |
| <i>ndhI</i>    | 0.00117                              | 0                                 | <i>rps12(2)</i> | 0.00332                              | 0.00853                           | 0.39               |
| <i>rps15</i>   | 0                                    | 0                                 | <i>psbI</i>     | 0                                    | 0.00904                           | 0                  |
| <i>rps7(2)</i> | 0                                    | 0                                 | <i>rpl36</i>    | 0.06019                              | 0.08333                           | 0.72               |
| <i>ndhB(2)</i> | 0                                    | 0                                 |                 |                                      |                                   |                    |
| <i>ycf2</i>    | 0.00005                              | 0                                 |                 |                                      |                                   |                    |
| <i>rpl23</i>   | 0                                    | 0                                 |                 |                                      |                                   |                    |
| <i>rpl2</i>    | 0                                    | 0                                 |                 |                                      |                                   |                    |
